# Supplementary material for: Exoscopic Microsurgery: A Change of Paradigm in Brain Tumor Surgery? Comparison with Standard Operative Microscope
Source: MDPI journal article supplement (doi:10.3390/brainsci13071035), 2023-07-06

## SUPPLEMENTARY MATERIALS

### Exoscopic Microsurgery: a Change of Paradigma in Brain Tumors Surgery? Comparisons with standard operative microscope

Andrea Di Cristofori, Francesca Graziano, Chiara Benedetta Rui, Paola Rebora, Diego Di Caro, Gaia Chiarello, Giovanni Stefanoni, Chiara Julita, Santa Florio, Davide Ferlito, Gianpaolo Basso, Giuseppe Citerio, Paolo Remida, Giorgio Carrabba and Carlo Giussani

Figure S1 - PFS and OS for clinical characteristics

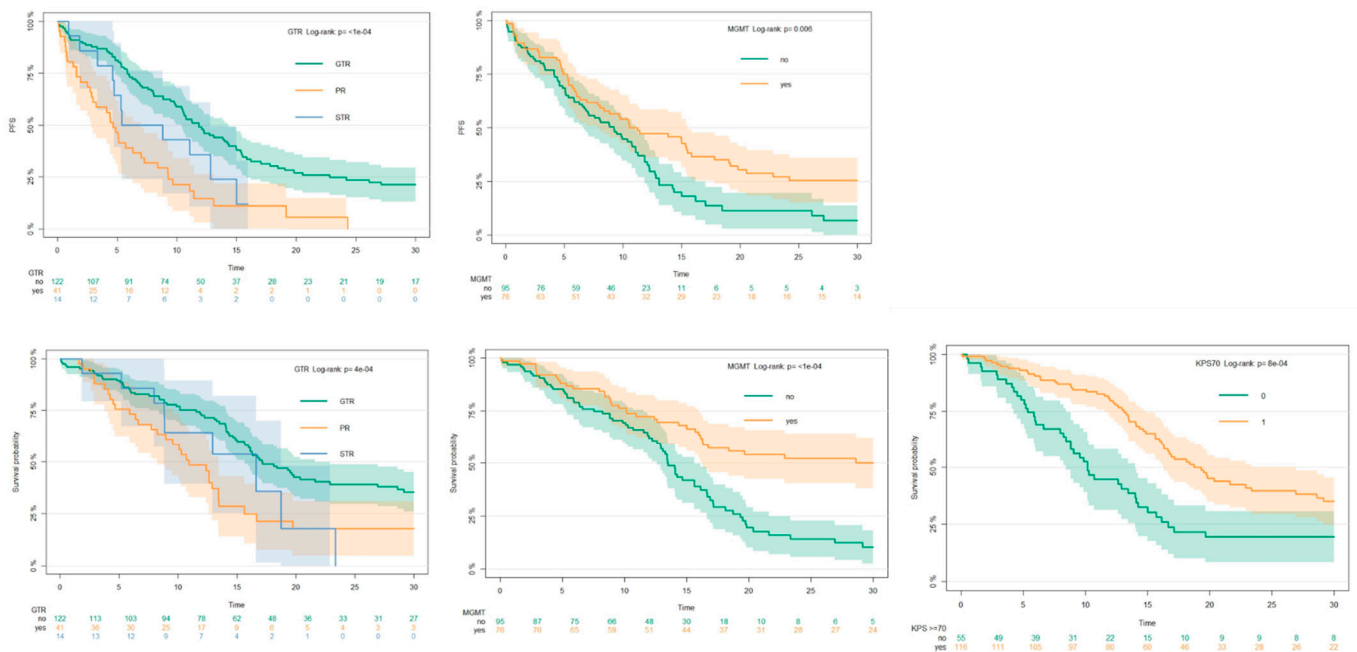

Figure S2 - Results of Cox model with sensitivity without administrative censoring

| Variable   |       | N   | Hazard ratio |                   | p      |
|------------|-------|-----|--------------|-------------------|--------|
| instrum    | exo   | 31  | ■            | Reference         |        |
|            | micro | 134 | ■            | 3.20 (1.52, 6.75) | 0.002  |
| sex        | F     | 60  | ■            | Reference         |        |
|            | M     | 105 | ■            | 1.40 (0.94, 2.07) | 0.098  |
| age        |       | 165 | ■            | 1.01 (0.99, 1.03) | 0.163  |
| KPS_       | <70   | 51  | ■            | Reference         |        |
|            | >= 70 | 114 | ■            | 0.57 (0.38, 0.85) | 0.006  |
| GTR        | GTR   | 113 | ■            | Reference         |        |
|            | PR    | 38  | ■            | 3.88 (2.46, 6.12) | <0.001 |
|            | STR   | 14  | ■            | 1.66 (0.84, 3.29) | 0.148  |
| MGMT       | no    | 91  | ■            | Reference         |        |
|            | yes   | 74  | ■            | 0.54 (0.36, 0.81) | 0.003  |
| experience | HIGH  | 120 | ■            | Reference         |        |
|            | LOW   | 45  | ■            | 1.43 (0.95, 2.15) | 0.087  |

Figure S3 - Results of Cox model considering including only patients with surgery after 2021

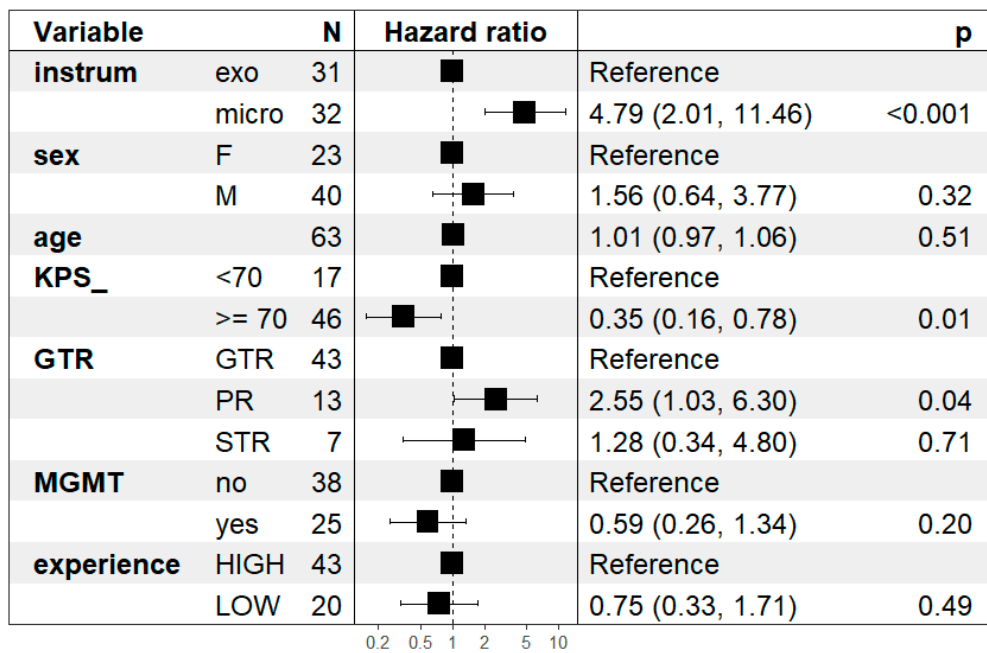

Supplement: s1 [file s1]
